# Supplementary material for: Chronic myeloid leukemia progenitor cells require autophagy when leaving hypoxia-induced quiescence
Source: PubMed Central journal article supplement (PMC5722539; doi:10.18632/oncotarget.18904), 2017-06-30
Supplement: oncotarget-08-96984-s001.pdf [file oncotarget-08-96984-s001.pdf]

# Chronic myeloid leukemia progenitor cells require autophagy when leaving hypoxia-induced quiescence

## Supplementary Materials

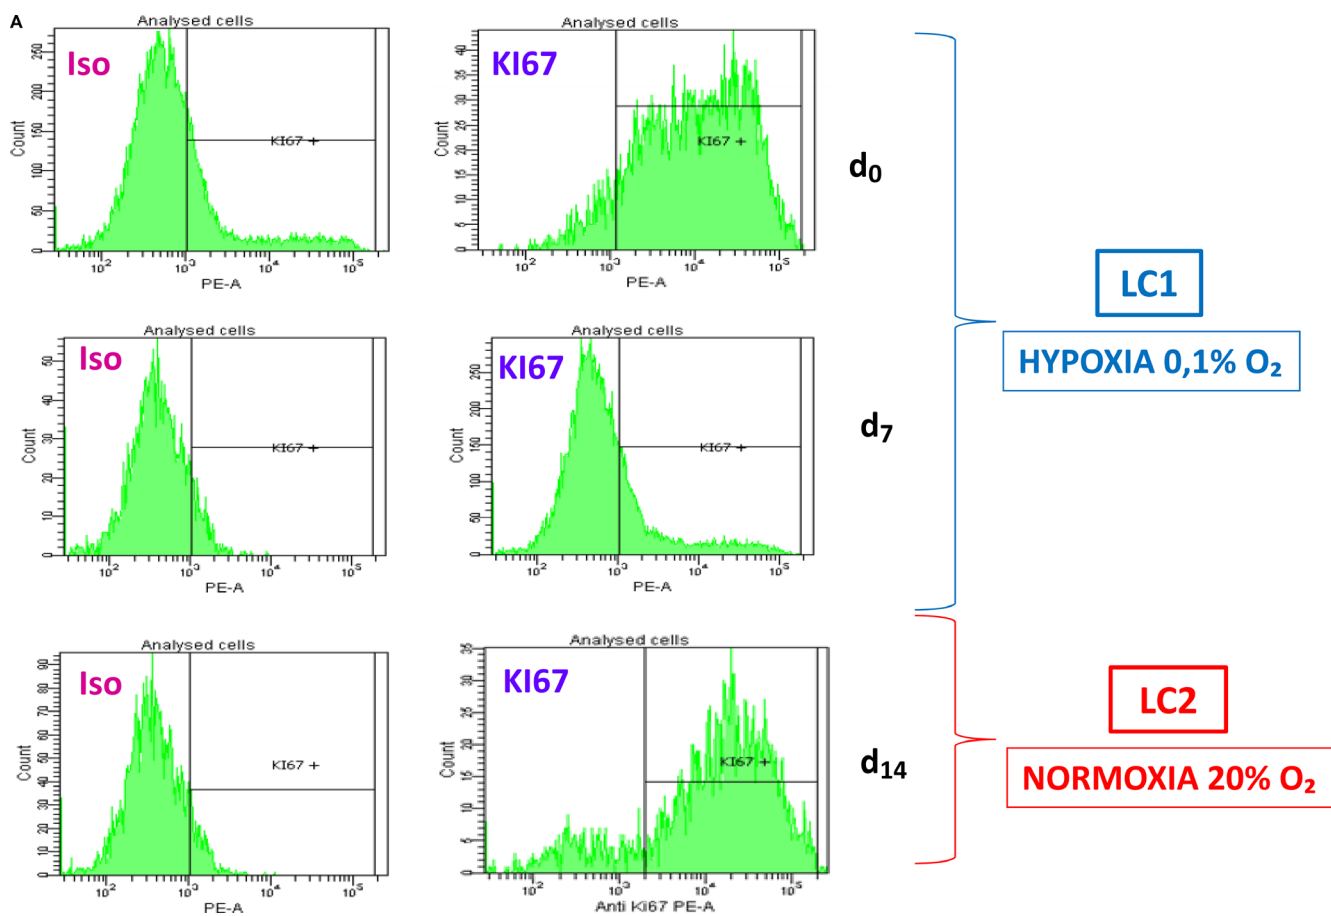

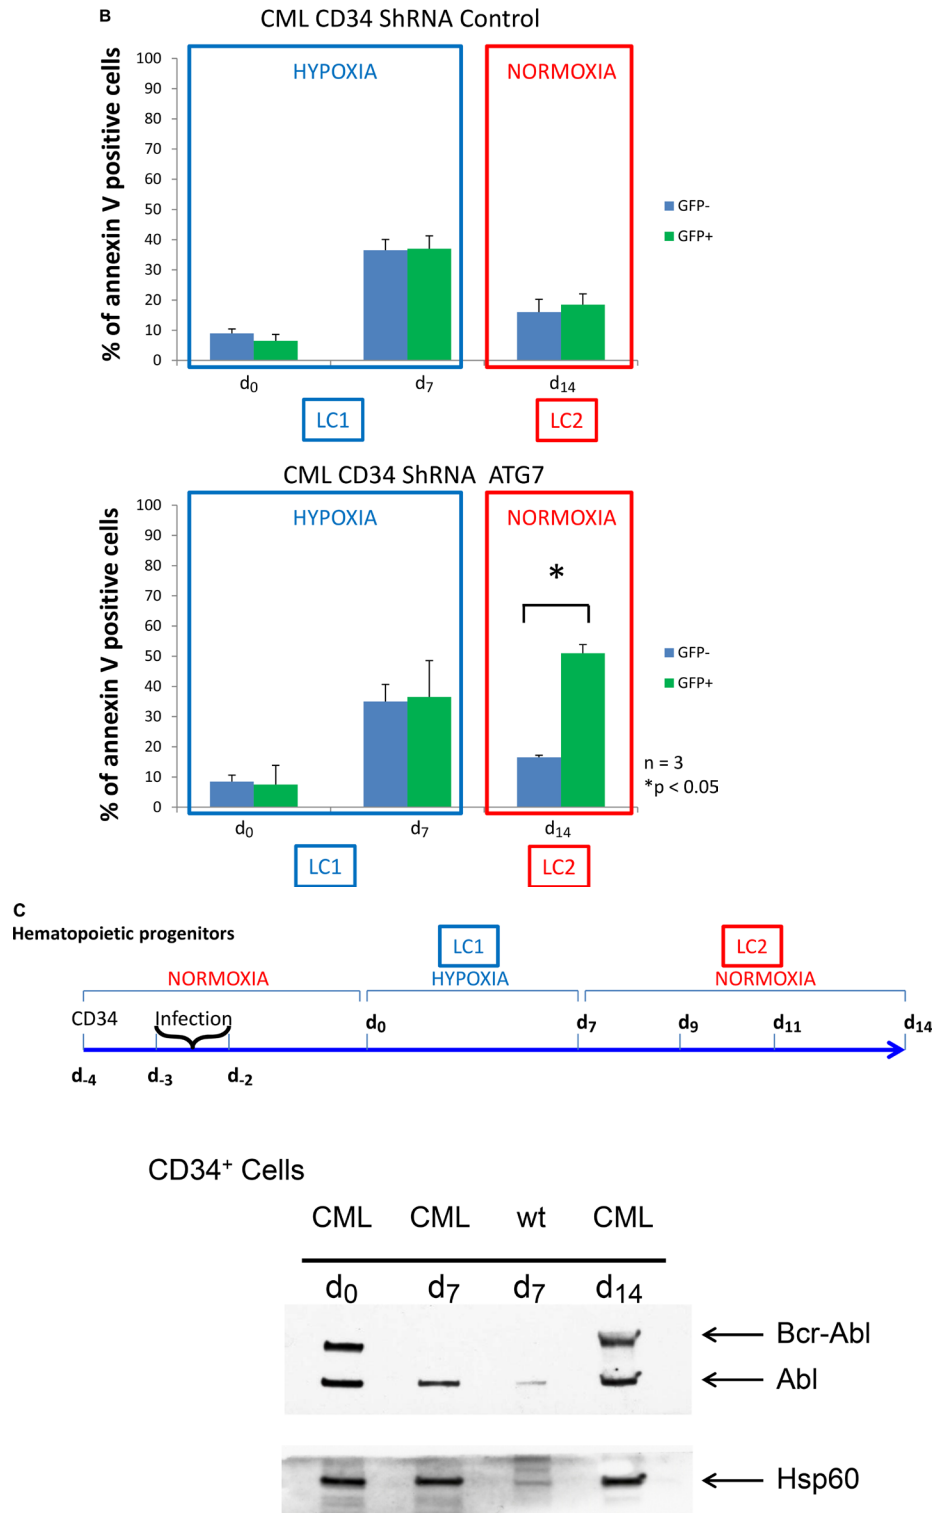

**Supplementary Figure 1:** (A) CML CD34<sup>+</sup> cells transduced with a shRNA against ATG7 were cultured at low O<sub>2</sub> concentration (0.1% O<sub>2</sub>) for 7 days (LC1). Upon 7 days, cells were replaced at atmospheric O<sub>2</sub> concentration and grown for 7 more days (LC2). At days 0, 7 and 14, aliquot (5.10<sup>5</sup> cells) were fixed in 4% paraformaldehyde for 15 min. Then, permeabilized with 0.1% Triton X-100 and then washed in PBS. Phycoerythrine-coupled antibody against Ki67 was incubated for 30 min and analysed by flow cytometry. Results are from one experiment representative of 3. (B) CML CD34<sup>+</sup> cells were transduced with a shRNA against luciferase (shRNA Control) or a shRNA against ATG7 (ShRNA ATG7). CML CD34<sup>+</sup> cells were cultured at low O<sub>2</sub> concentration (0.1% O<sub>2</sub>) for 7 days (LC1). Upon 7 days, cells were replaced at atmospheric O<sub>2</sub> concentration and grown for 7 more days (LC2). At indicated time, aliquot were analyzed for apoptosis by flow cytometry using annexin V-APC labelling on the two population GFP<sup>-</sup> and GFP<sup>+</sup>. Results are from at least 3 experiments. Significance between GFP<sup>-</sup> and GFP<sup>+</sup> cells was quantitated using Wilcoxon test. (C) CML and normal CD34<sup>+</sup> cells were cultured at low O<sub>2</sub> concentration (0.1% O<sub>2</sub>) for 7 days (LC1). Upon 7 days, cells were replaced at atmospheric O<sub>2</sub> concentration and grown for 7 more days (LC2). At days 0, 7 and 14, aliquot (10<sup>6</sup> cells) were lysed in ripa buffer and Bcr-Abl was detected by western blot. For normal CD34<sup>+</sup> cells only the time at day 7 was analyzed.

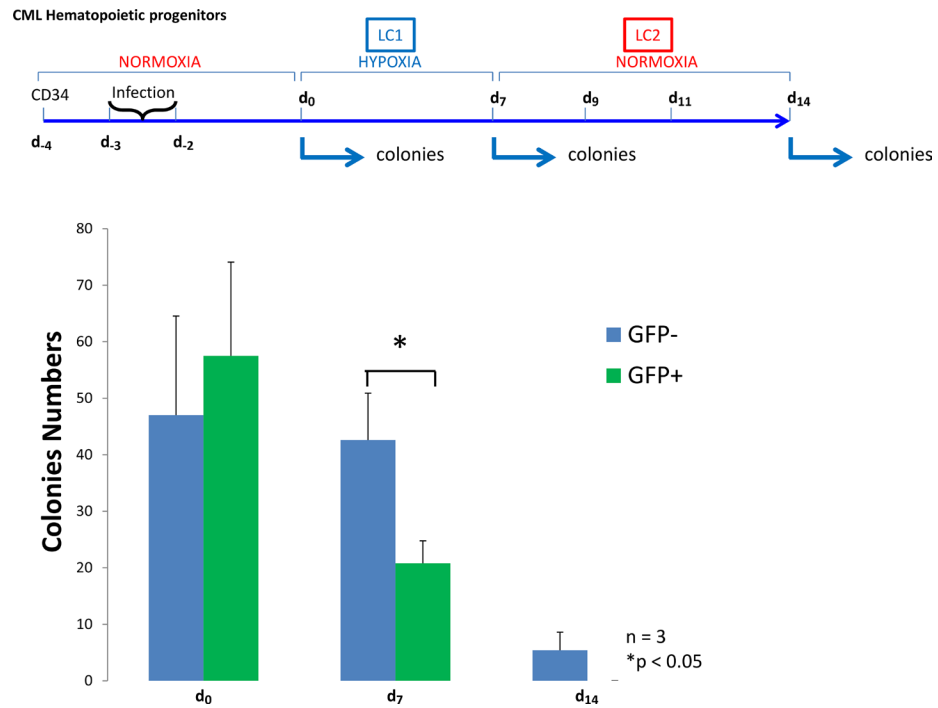

**Supplementary Figure 2 : CML CD34<sup>+</sup> cells treated as described in Figure 2 were seeded in methyl cellulose at days 0, 7 and 14.** Number of GFP<sup>-</sup> and GFP<sup>+</sup> colonies were counted in triplicates in three separated experiments. Results are expressed as total number of colonies. Significance between GFP<sup>-</sup> and GFP<sup>+</sup> colonies was quantitated using Wilcoxon test and show by an asterisk when  $p < 0.05$ .

**A WB LC3B, Sorted CD34 WT shATG7**

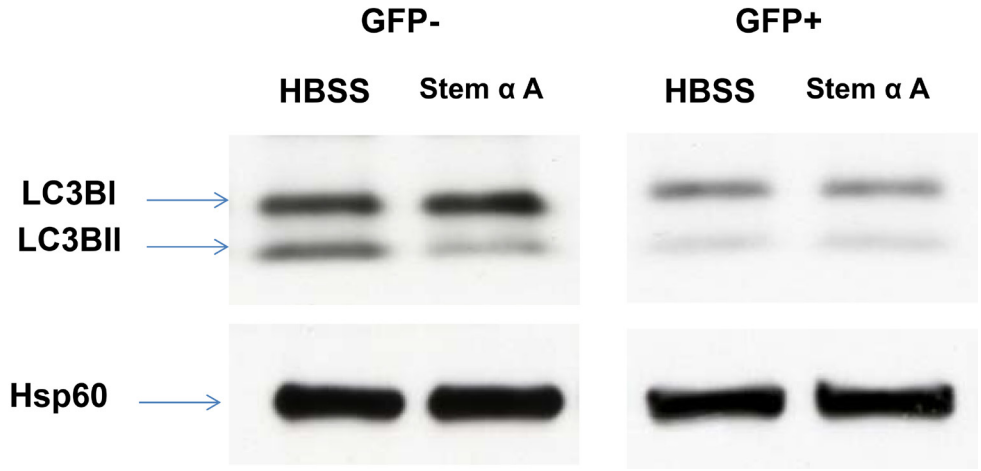

**B Normal Hematopoietic progenitors**

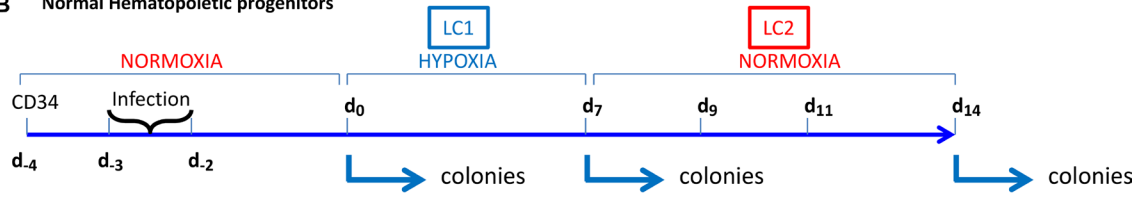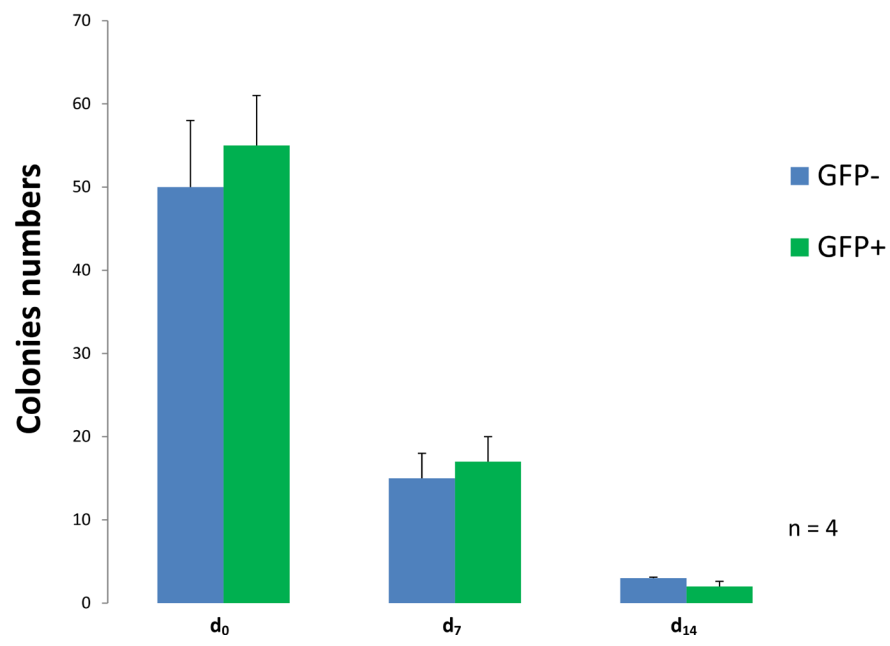

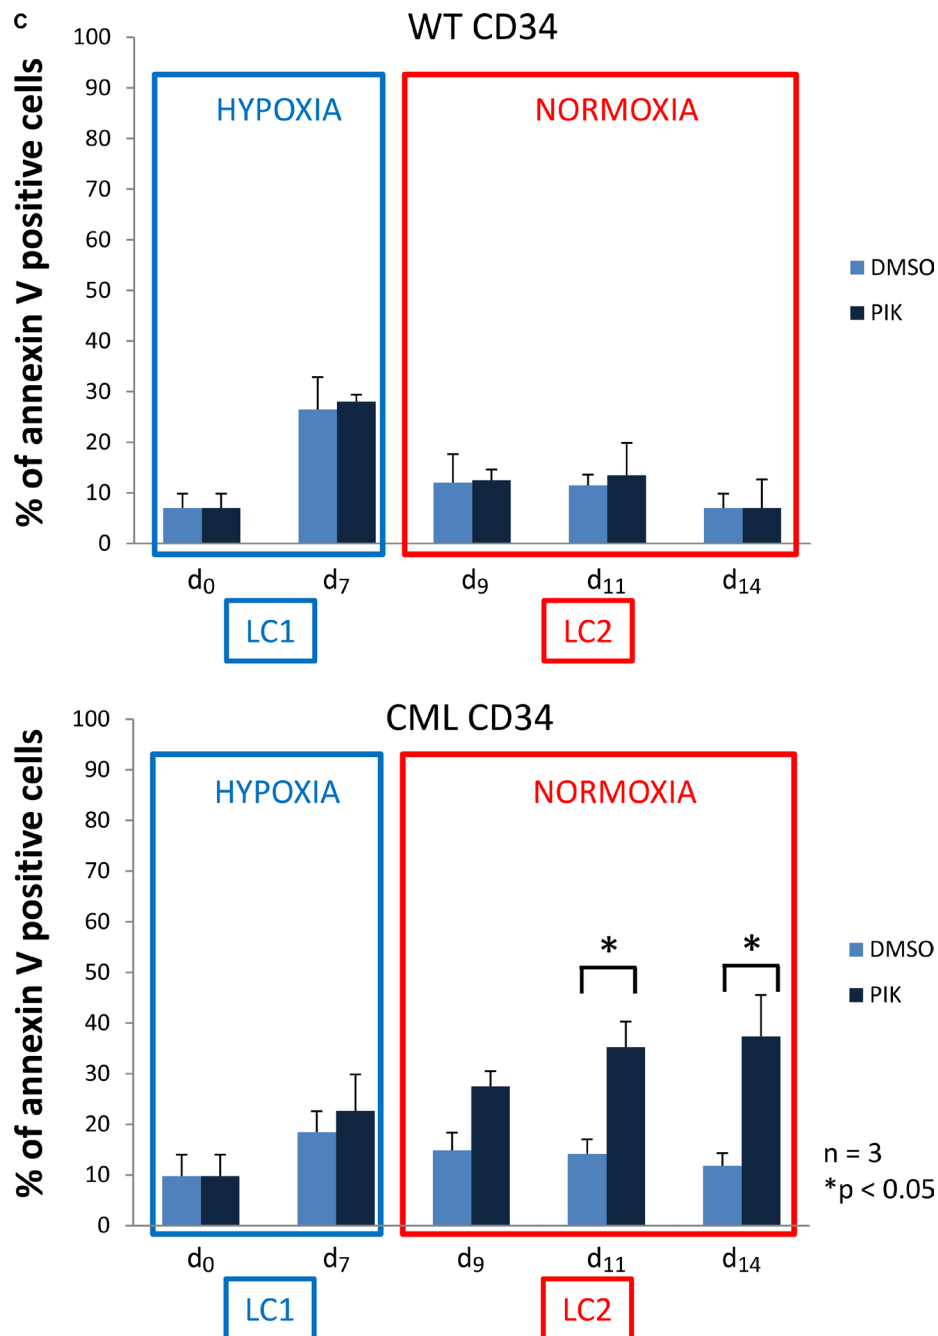

**Supplementary Figure 3:** (A) Normal CD34<sup>+</sup> cells were transduced with a shRNA against ATG7. Upon cell sorting, GFP<sup>-</sup> and GFP<sup>+</sup> cells were incubated in growing medium (stem a A) or minimal medium (HBSS) for 4 hours. Cells were then lysed and autophagy operating mechanism was checked by detecting the conversion of microtubule associated light chain 3B-I in LC3B-II. As control loading, Hsp60 was detected. (B) Normal CD34<sup>+</sup> progenitor cells treated as described in Figure 3 were seeded in methyl cellulose at days 0, 7 and 14. Number of GFP<sup>-</sup> and GFP<sup>+</sup> colonies were counted in triplicates in 4 separated experiments. Results are expressed as total number of colonies. (C) Normal and CML CD34<sup>+</sup> cells were cultured at low O<sub>2</sub> concentration (0.1% O<sub>2</sub>) for 7 days (LC1). Upon 7 days, cells were replaced at atmospheric O<sub>2</sub> concentration and grown in the presence of vehicle alone (DMSO) or 1 μM PIK-III (PIK) for 7 more days (LC2). At indicated time, aliquots were analyzed for apoptosis by flow cytometry using annexin V-APC labelling. Results are from at least 3 experiments. Significant difference between treated and untreated cells was quantitated using Wilcoxon test and shown by an asterisk when  $p < 0.05$ .
